# Supplementary material for: Cyclodextrin-Based Nanoparticles for Delivery of Antisense Oligonucleotides Targeting Huntingtin
Source: MDPI journal article supplement (doi:10.3390/pharmaceutics15020520), 2023-02-03
Supplement: s1 [file s1]

Article

# Cyclodextrin-based nanoparticles for delivery of antisense oligonucleotides targeting Huntingtin

Monique C. P. Mendonça <sup>1</sup>, Yao Sun <sup>1</sup>, Michael F. Cronin <sup>1</sup>, Andrew J. Lindsay <sup>2</sup>, John F. Cryan <sup>3</sup> and Caitriona M. O'Driscoll <sup>1,\*</sup>

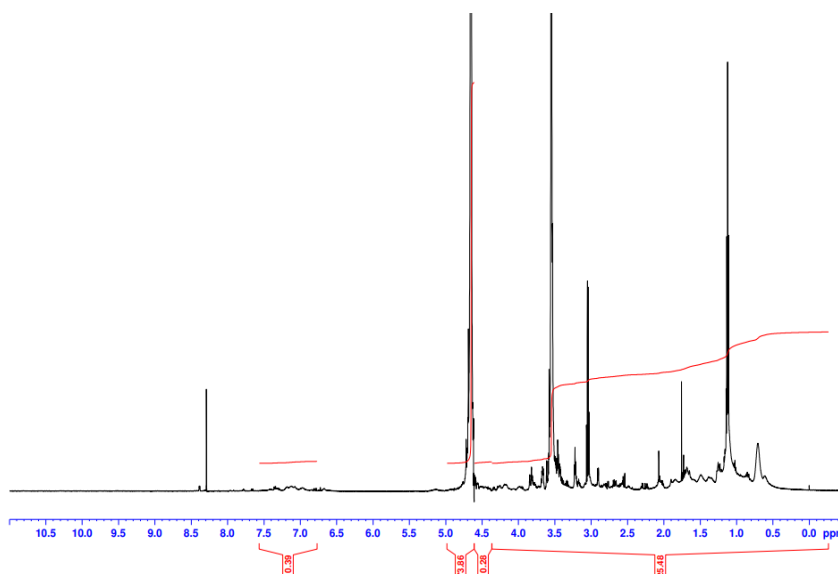

**Figure S1.** <sup>1</sup>H NMR spectra of DSPE-PEG-Maleimide-RVG product in D<sub>2</sub>O. The loss of the characteristic maleimide peak at 6.68 ppm confirmed the successful conjugation of RVG to maleimide-CD.

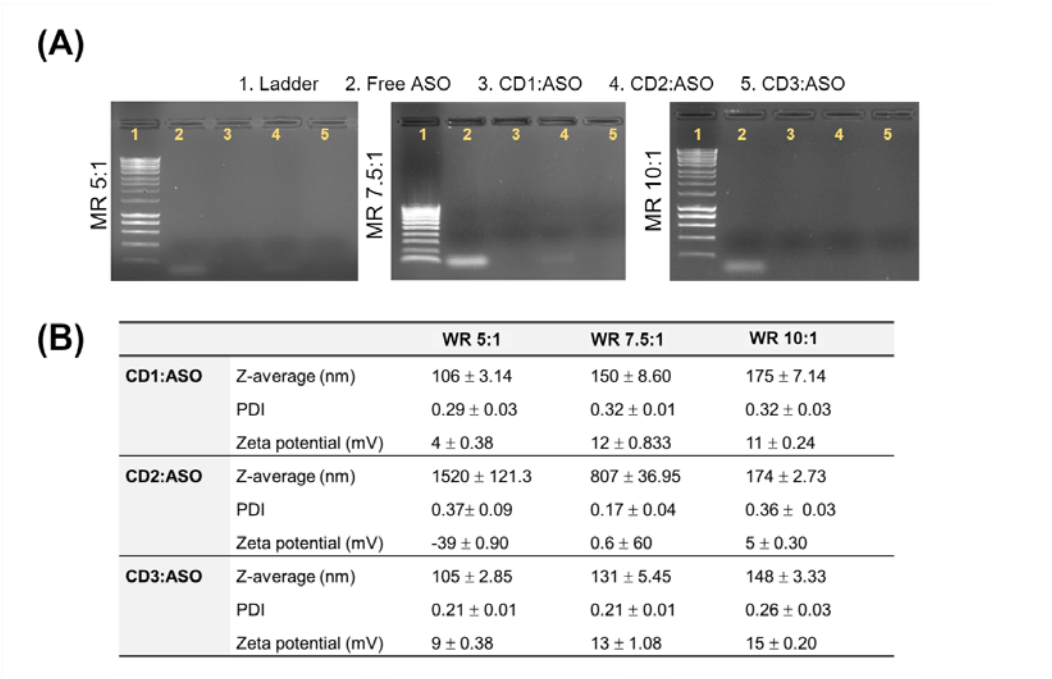

**Figure S2.** (A) Representative agarose gel electrophoresis illustrating ASO binding to cyclodextrins (CDs); (B) Physicochemical properties of CDs: ASO nanocomplexes at different weight ratios (WR).

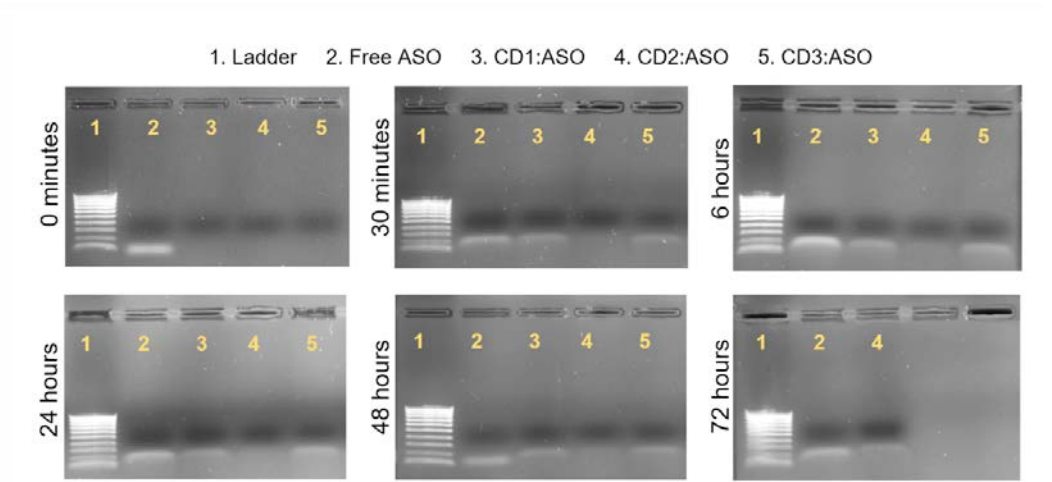

**Figure S3.** Representative agarose gel electrophoresis illustrating heparin-induced ASO release from CDs: ASO complexes.

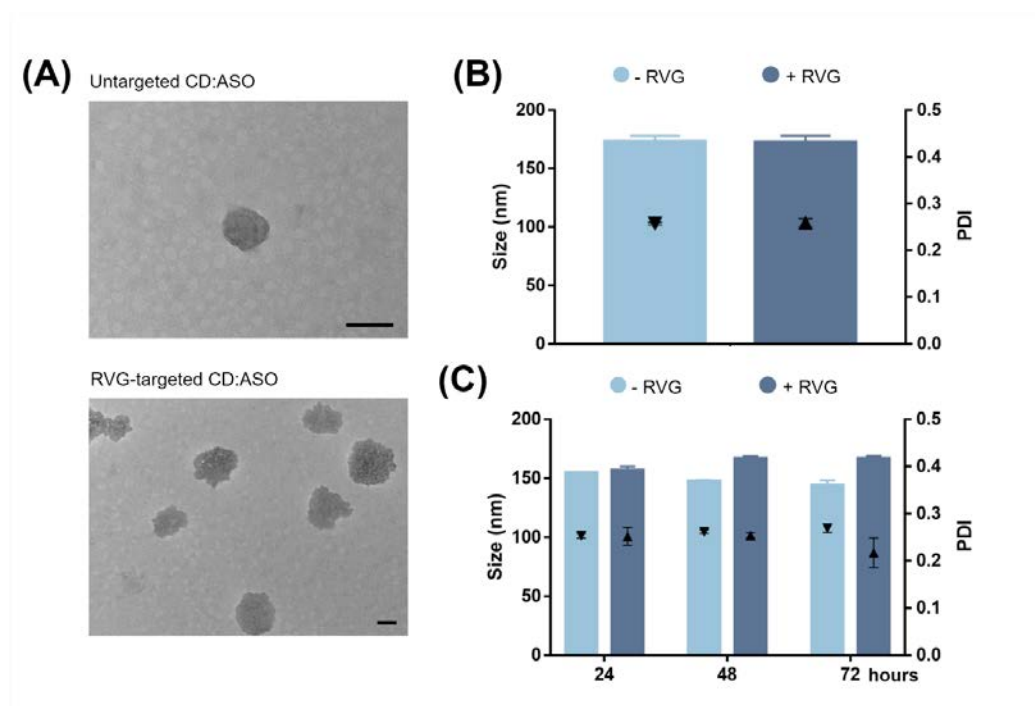

**Figure S4. Physicochemical characterisation of RVG-targeted cyclodextrins (CD).ASO complexes.** (A) Representative transmission electron microscopy (TEM) of RVG-targeted and untargeted CD3:ASO nanocomplexes. (B) Particle size and *Polydispersity index* (PDI) in hCMEC/D3 culture media. (C) Time-dependent particle size and PDI in hCMEC/D3 culture media at 37°C. Mean  $\pm$  S.E.M of 6 technical replicates. All at mass ratio 10:1, 750 nM ASO. Scale bars = 100 nm.

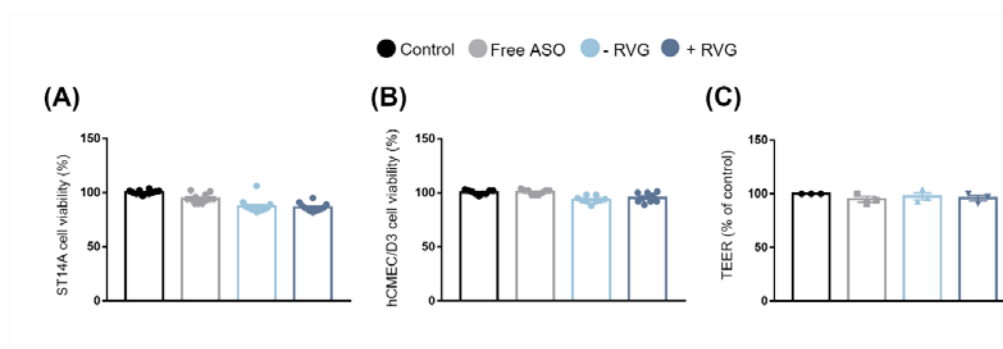

**Figure S5. Effects of RVG-targeted cyclodextrins (CD).ASO complexes on cell viability and TEER.** (A) The viability of ST14A cells ( $1.5 \times 10^6$ ) and hCMEC/D3 cells ( $3.0 \times 10^4$ ) were measured 72 h after treatment with CDs loaded with ASO, weight ratio 10:1, 100 nM per well. Living cells were determined using a CellTiter-FLUor assay and expressed as a % of the control. (B) Transendothelial resistance (TEER) was measured on day 11 (3 days of treatment) using EVOL volt-ohm meter. TEER values are shown as % of control. Mean  $\pm$  S.E.M of 3 technical replicates performed in triplicate.

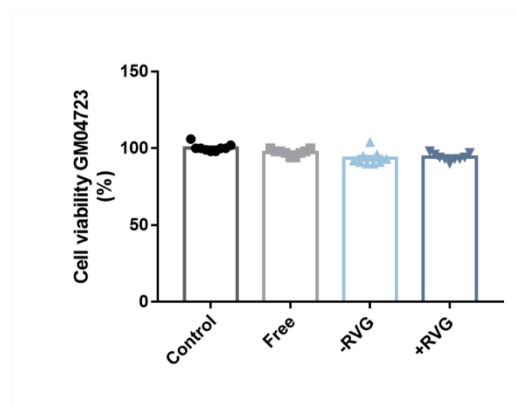

**Figure S6.** Viability of HD patient-derived fibroblast cell line GM04723 (CAG15/67) measured 72 h after treatment with CDs loaded with ASO, weight ratio 10:1, 100 nM per well. Living cells were determined using a CellTiter-FLuor assay and expressed as a % of the control. Mean  $\pm$  S.E.M of 3 technical replicates performed in triplicate.

**Table S1.** Results of two-way analysis of variance of the effects of RVG-targeted and untargeted cyclodextrins: ASO nanocomplexes on total HTT expression.

|                    | Effect      | p        | F     |
|--------------------|-------------|----------|-------|
| <b>Co-culture</b>  | Targeting   | 0.0017   | 7.028 |
|                    | Mutation    | < 0.0001 | 28.16 |
|                    | Interaction | 0.0013   | 7.03  |
| <b>Monoculture</b> | Targeting   | < 0.0001 | 38.77 |
|                    | Mutation    | 0.0083   | 8.79  |
|                    | Interaction | ns       | 1.54  |
